# Supplementary material for: The Effects of Chitosan on the Healing Process of Oral Mucosa: An Observational Cohort Feasibility Split-Mouth Study
Source: MDPI journal article supplement (doi:10.3390/nano13040706), 2023-02-12
Supplement: s1 [file s1]

# Supplementary Materials: The effects of the chitosan on the healing process of the oral mucosa

Clinical information about each patient's case

## Patient 1

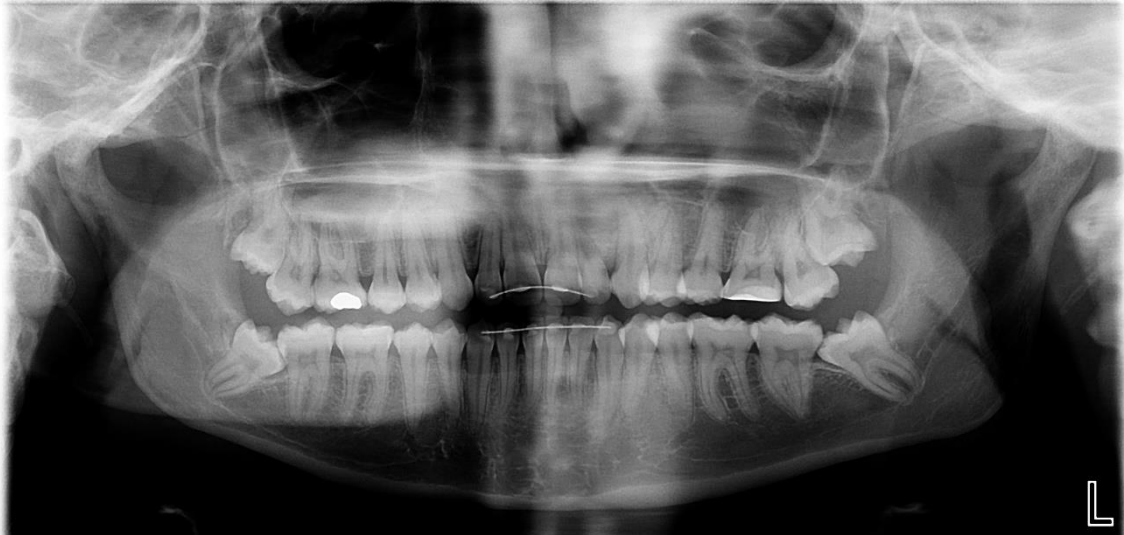

Figure S1. Patient 1: Orthopantomography.

Chitosan (Q): tooth 4.8

- Pell and Gregory classification: I B
- Intervention Time: <30 minutes
- Suture: 3 simple points

Control (C): tooth 3.8

- Pell and Gregory classification: I B
- Intervention Time: <30 minutes
- Suture: 3 simple points

## Patient 2

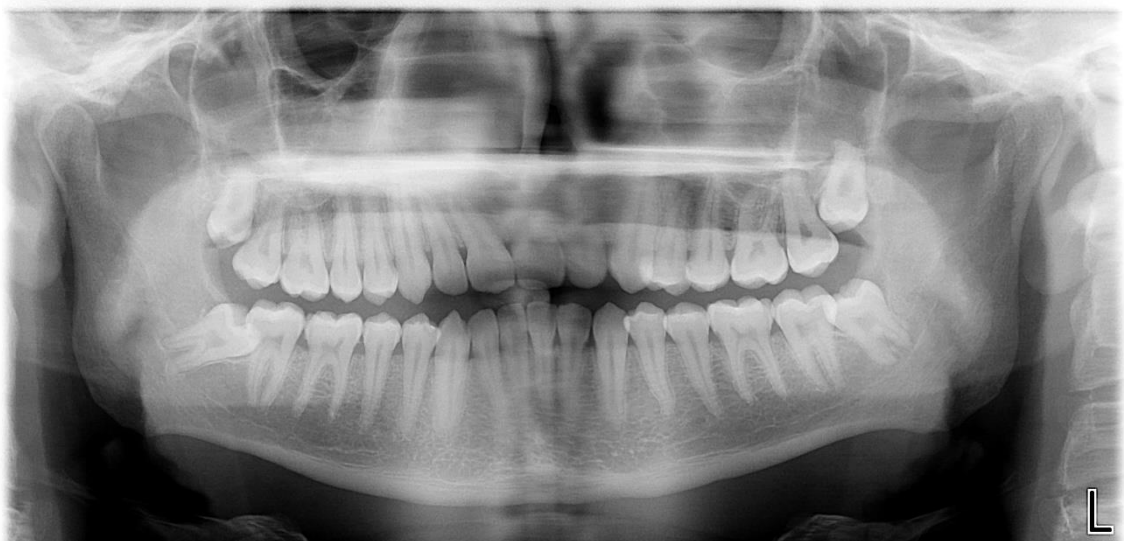

Figure S2. Patient 2: Orthopantomography.

Chitosan (Q): tooth 3.8

- Pell and Gregory classification: II B
- Intervention time: <30 minutes;
- Suture: 3 simple points.

Control (C): Tooth 4.8 - It was performed osteotomy.

- Pell and Gregory classification: II B
- Intervention time: <30 minutes;
- Suture: 3 simple points.

#### **Patient 3**

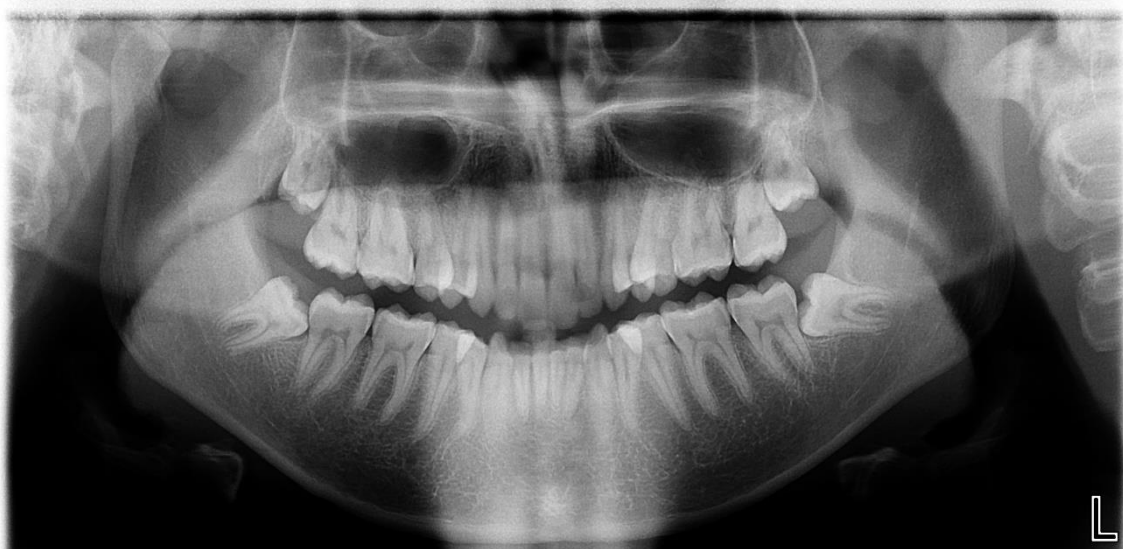

**Figure S3.** Patient 3: Orthopantomography.

Chitosan (Q): tooth 4.8 - It was performed osteotomy.

- Pell and Gregory classification: I B
- Intervention time: <30 minutes;
- Suture: 3 simple points.

Control (C): Tooth 3.8

- Pell and Gregory classification: II B
- Intervention Time: <30 minutes;
- Suture: 3 simple points

#### **Patient 4**

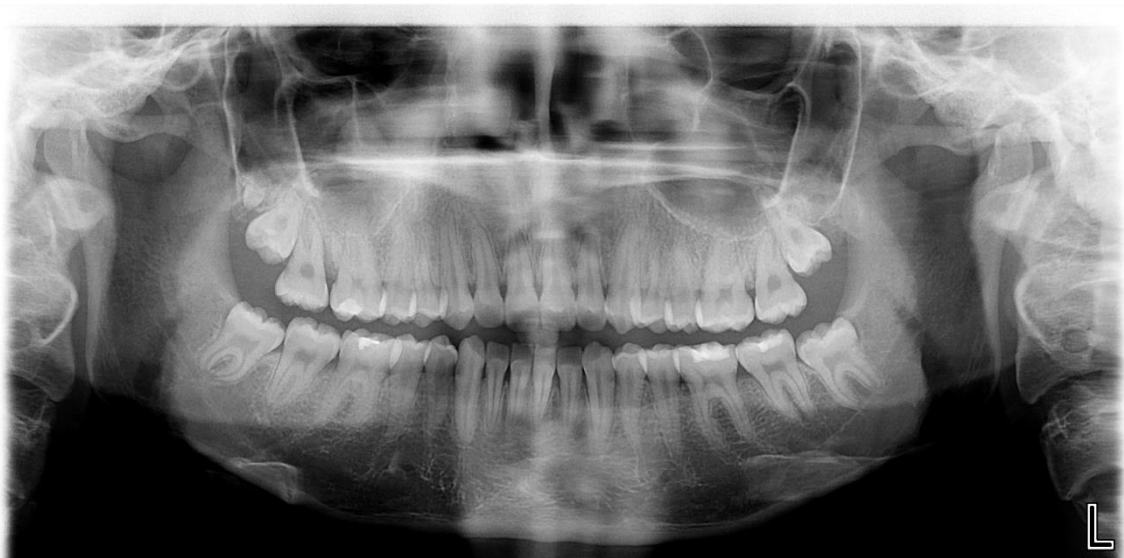

**Figure S4.** Patient 4: Orthopantomography.

Chitosan (Q): tooth 4.8

- Pell and Gregory classification: I B;
- Intervention Time: <30 minutes;
- Suture: 4 simple points.

Control (C): Tooth 3.8

- Pell and Gregory classification: I B;
- Intervention Time: <30 minutes;
- Suture: 3 simple points.

#### **Patient 5**

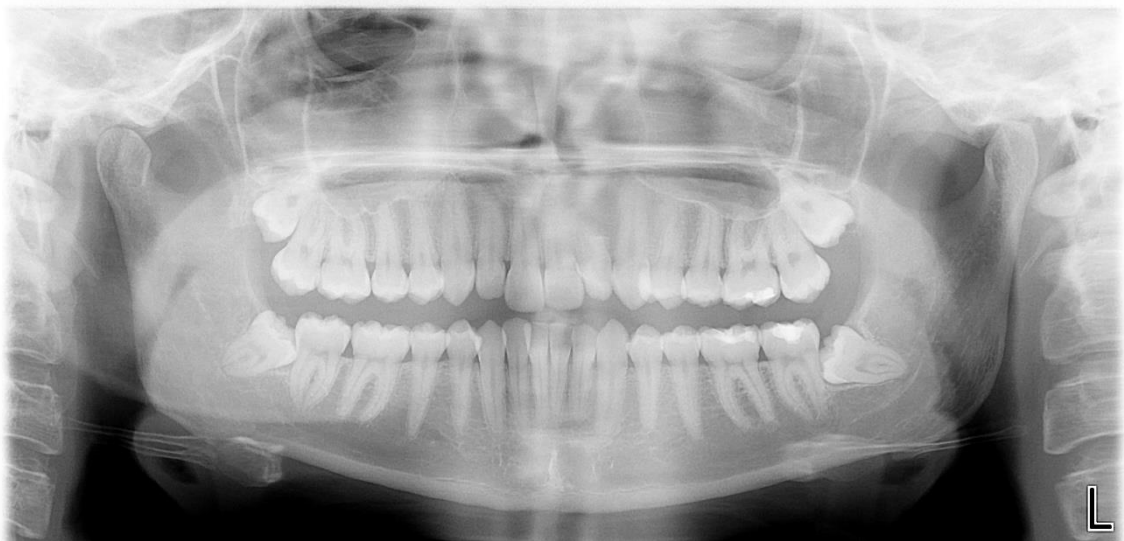

**Figure S5.** Patient 5: Orthopantomography.

Chitosan (Q): tooth 3.8 - It was performed osteotomy

- Pell and Gregory classification: II B;
- Intervention Time: 30 - 60 minutes.
- Suture: 3 simple points.

Control (C): tooth 4.8

- Pell and Gregory classification: I B;
- Intervention Time: <30 minutes.

- Suture: 3 simple points.

#### Patient 6

---

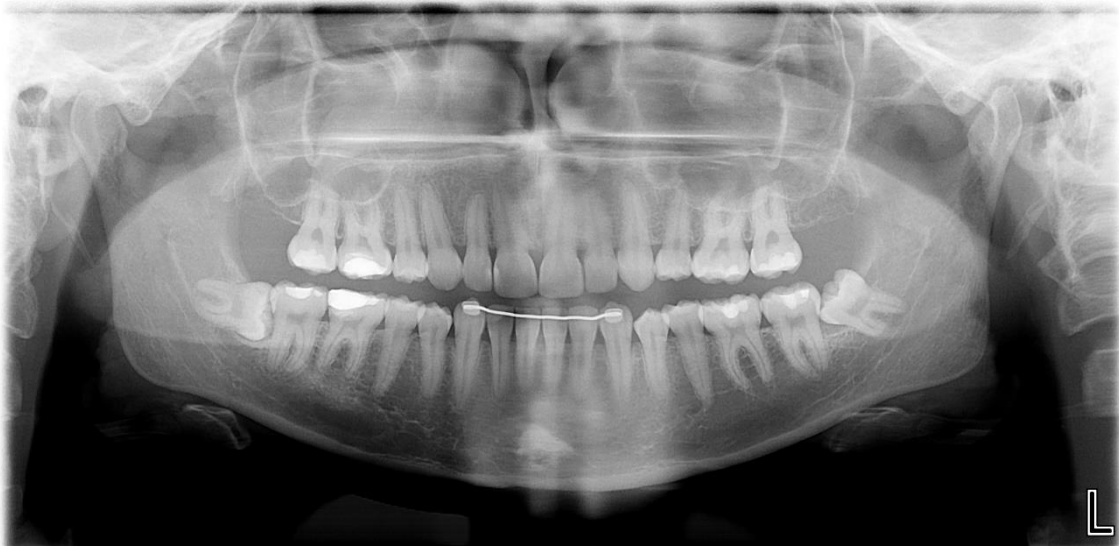

**Figure S6.** Patient 6: Orthopantomography.

Chitosan (Q): tooth 3.8

- Pell and Gregory classification: I B
- Intervention Time: <30 minutes;
- Suture: 3 simple points.

Control (C): tooth 4.8 - It was performed osteotomy;

- Pell and Gregory classification: II B
- Intervention Time: 30 - 60 minutes;
- Suture: 3 simple points.

#### Patient 7

---

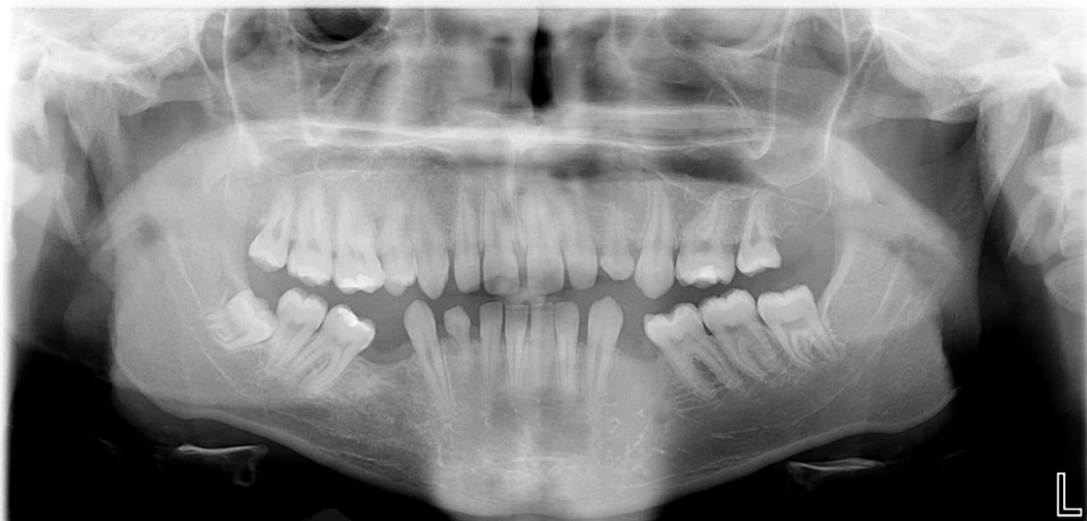

**Figure S7.** Patient 7: Orthopantomography.

Chitosan (Q): 4.8

- Pell and Gregory classification: II B
- Intervention Time: <30 minutes;

- Suture: 3 simple points.
- Control (C): 3.8
- Pell and Gregory classification; I B;
  - Intervention Time: <30 minutes;
  - Suture: 3 simple points.

#### Patient 8

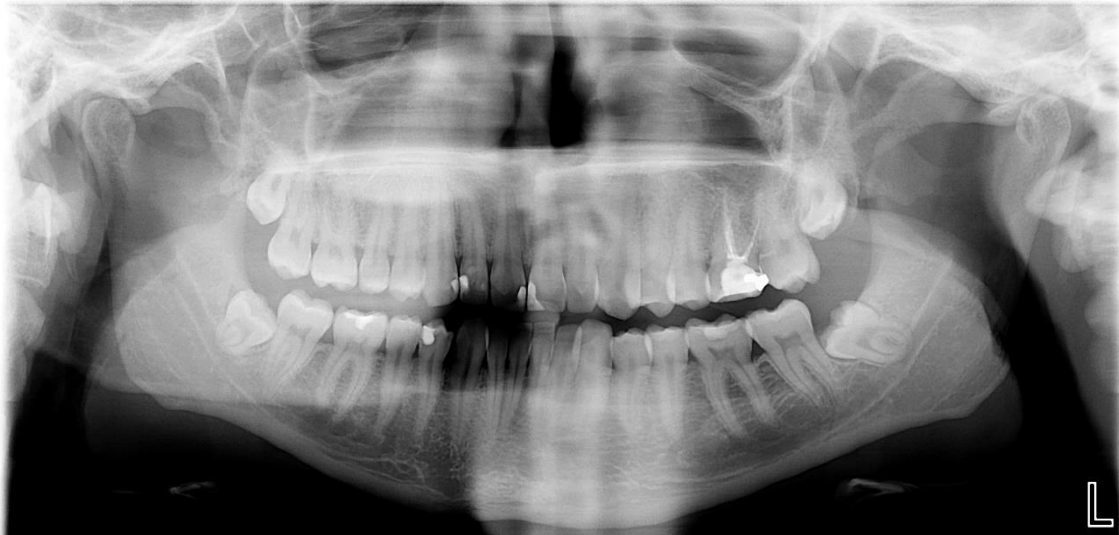

**Figure S8.** Patient 8: Orthopantomography.

- Chitosan (Q): tooth 4.8
- Pell and Gregory classification: II B;
  - Intervention Time: <30 minutes;
  - Suture: 3 simple points.
- Control (C): tooth 3.8
- Pell and Gregory classification: I B;
  - Intervention Time: <30 minutes;
  - Suture: 3 simple points.

**Table S1.** Demographic characteristics of all patients.

| Patient | Gender | Age (years) |
|---------|--------|-------------|
| 1       | Female | 21          |
| 2       | Male   | 19          |
| 3       | Male   | 22          |
| 4       | Female | 21          |
| 5       | Female | 21          |
| 6       | Female | 24          |
| 7       | Male   | 27          |
| 8       | Female | 22          |

## Follow-up of patients

**Table S2.** Postoperative evaluation of all patients. Pain intensity, redness, swelling, loss of function, and bleeding were recorded in sockets with chitosan (Q) and without chitosan (control, C).

[illegible]
